# Supplementary material
Source: PubMed Central journal article supplement (PMC6731461)
Supplement: mmc1.pdf [file mmc1.pdf]

**Immunity, Volume 51**

**Supplemental Information**

**The HVEM-BTLA Axis Restrains T Cell Help  
to Germinal Center B Cells and Functions  
as a Cell-Extrinsic Suppressor in Lymphomagenesis**

**Michelle A. Mintz, James H. Felce, Marissa Y. Chou, Viveka Mayya, Ying Xu, Jr-Wen Shui, Jinping An, Zhongmei Li, Alexander Marson, Takaharu Okada, Carl F. Ware, Mitchell Kronenberg, Michael L. Dustin, and Jason G. Cyster**

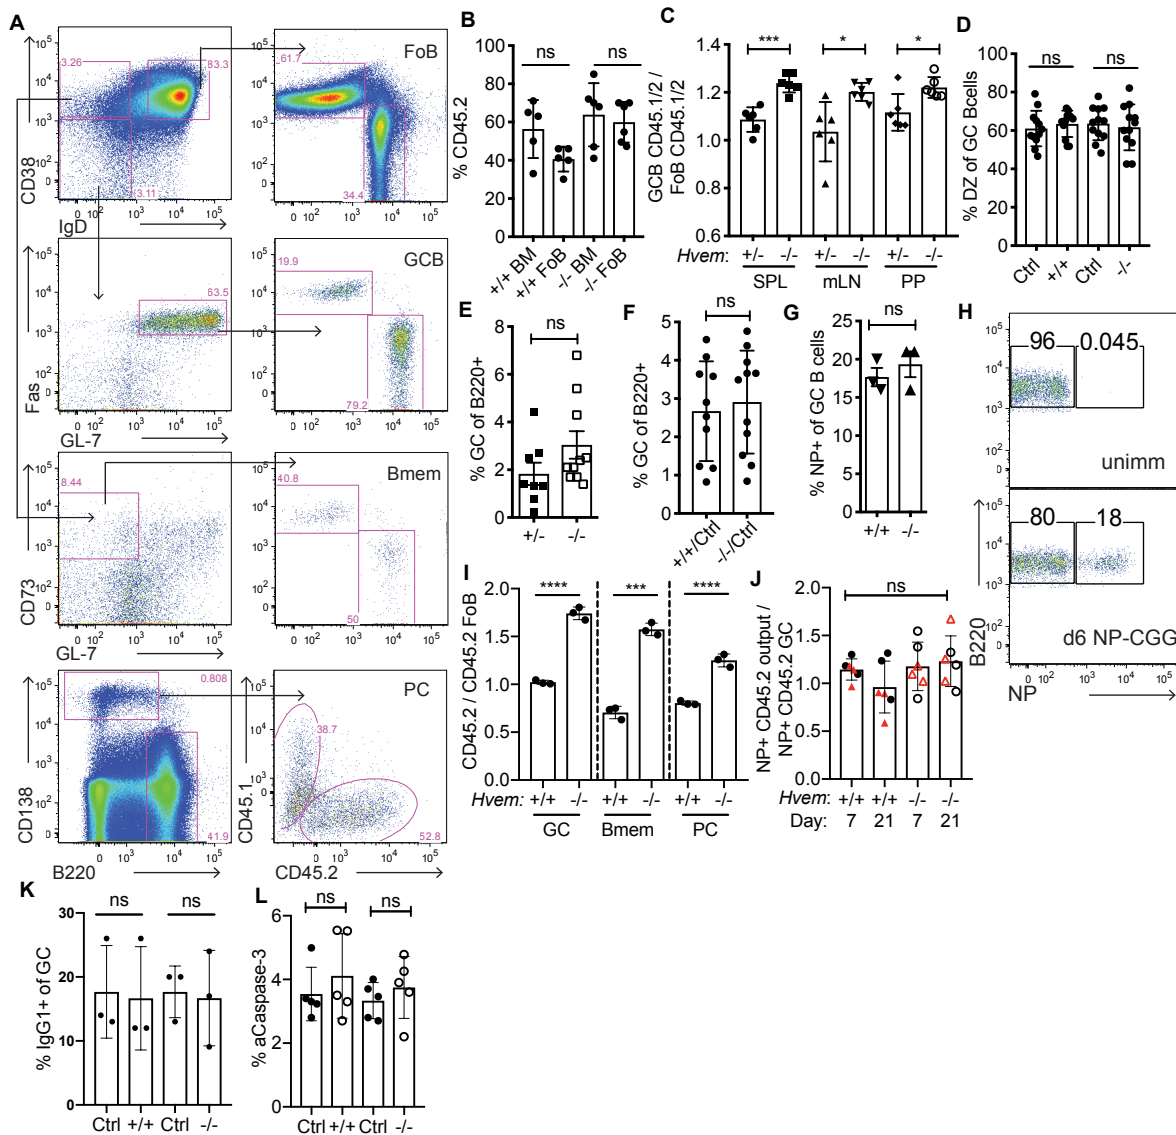

**Figure S1. HVEM-deficiency increases GC B cell competitiveness in chronic GCs and GC output after an acute immune response. Related to Figure 1.**

(A) Representative flow cytometric analysis of spleen Fo, GC, Bmem, and PC populations from mixed BM chimeras after SRBC immunization. (B) Contribution of CD45.2 cells to CD93<sup>+</sup> immature BM B cells and splenic Fo B cells in mixed BM chimeras. Data pooled from 2 experiments. (C) Ratio of CD45.1/2 GC to CD45.1/2 Fo B cells in mixed chimeras made with ~70% of CD45.1/2 *Hvem*<sup>+/-</sup> or *Hvem*<sup>-/-</sup> BM with ~30% CD45.1 WT BM in Spleen (SPL), mesenteric LN (mLN) and Peyer's Patches (PP), after intraperitoneal (i.p.) SRBC immunization. Data pooled from 2 independent experiments. (D) Frequency of GC B cells from mixed BM chimeras in dark zone (DZ) state (CXCR4<sup>high</sup>CD86<sup>low</sup>) after SRBC immunization. Data pooled from 3 experiments. (E) Frequency of GC B cells in full *Hvem*<sup>+/-</sup> or *Hvem*<sup>-/-</sup> animals 6–8 days after SRBC immunization. Data pooled from 3 experiments. (F) Frequency of GC B cells in *Hvem*<sup>+/+</sup> and *Hvem*<sup>-/-</sup> mixed BM chimeras after SRBC immunization. Data pooled from 3 experiments. (G) Frequency of NP<sup>+</sup> GC B cells in full, non-competitive *Hvem*<sup>+/+</sup> or *Hvem*<sup>-/-</sup> chimeras. (H) Representative flow cytometric analysis for splenic NP<sup>+</sup> GC B cell gating on day 6 NP-CGG alum response compared to unimmunized control. (I) Ratio of CD45.2 GC, memory B cells (Bmem), and plasma cells (PC) to CD45.2 Fo B cells at day 8 after SRBC immunization. *Hvem*<sup>-/-</sup> mixed chimera example shown in panel A. (J) Ratio of CD45.2 NP<sup>+</sup> splenic Bmem (black circles) or PC (red triangles) to CD45.2 NP<sup>+</sup> GC B cells at day 7 and 21 after NP-CGG immunization. Data from 1 experiment and representative of 3 experiments. (K) Frequency IgG1<sup>+</sup> of GC B cells in *Hvem*<sup>-/-</sup> mixed chimeras at day 8 after SRBC. (L) Frequency of anti-active Caspase-3<sup>+</sup> GC B cells from NP-CGG alum immunized mixed BM chimeras day 6-7 directly ex vivo. Data pooled from 2 experiments. 'Ctrl' refers to the respective WT CD45.1 competitor. \*P<0.05, \*\*P<0.01, \*\*\*P<0.001, \*\*\*\*P<0.0001. Unpaired two-tailed Student's t test (B-G, I, K-L), Ordinary One-Way Anova with Bonferroni's multiple comparisons test (J).

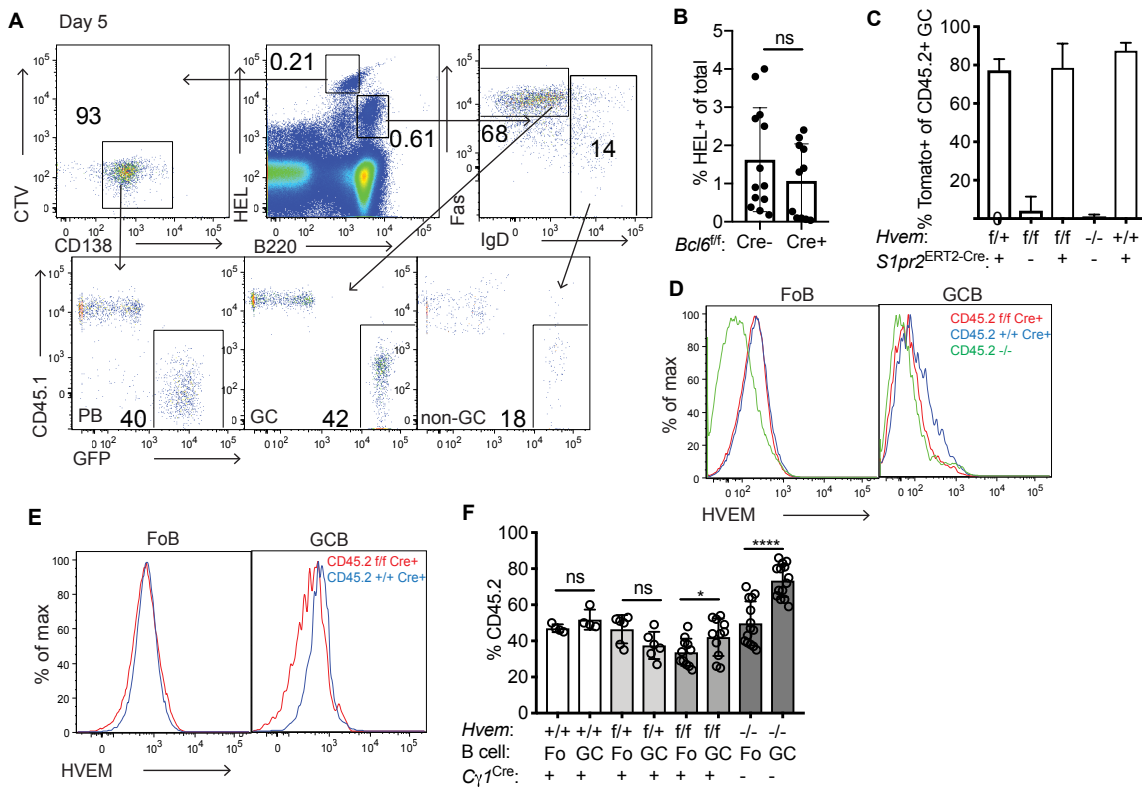

**Figure S2. HVEM-deficiency provides B cells with a proliferation advantage early in the response and within the GC. Related to Figure 2.**

(A) Representative flow cytometric analysis for gating GFP<sup>+</sup> HEL<sup>+</sup> B cells as HEL-intracellular-high CD138<sup>+</sup> plasmablasts (PB) and HEL-intermediate IgD<sup>lo</sup>Fas<sup>+</sup> GC B cells at days 4.5–5. (B) Frequency of HEL<sup>+</sup> cells of total spleen in *Bcl6<sup>fl/fl</sup> Cd4<sup>Cre</sup>* or controls at day 5–7 after 2x-HEL-SRBC. Data pooled from 3 experiments. (C) Frequency of tdTomato<sup>+</sup> of CD45.2 GC B cells after tamoxifen treatment. Data are pooled from 3 experiments. (D) Representative flow cytometric analysis of HVEM surface levels on Fo and GC B cells in CD45.2 compartment. Red *Hvem<sup>fl/fl</sup> S1pr2<sup>ERT2Cre</sup>*, blue *Hvem<sup>+/+</sup> S1pr2<sup>ERT2Cre</sup>*, and green *Hvem<sup>-/-</sup>*. (E) Representative flow cytometric analysis of HVEM surface levels in *Hvem<sup>fl/fl</sup> Cy1<sup>Cre</sup>* Fo and GC B cells in red and *Hvem<sup>+/+</sup> Cy1<sup>Cre</sup>* in blue. (F) *Hvem<sup>fl/fl</sup> Cy1<sup>Cre</sup>* and respective control CD45.2 mixed BM chimeras immunized with NP-CGG and analyzed day 10–13 for the frequency of CD45.2 cells in the Fo and GC compartments. Data are pooled from 3 experiments. \*P<0.05, \*\*\*P<0.001, \*\*\*\*P<0.0001. Unpaired two-tailed Student's t test (B, F).

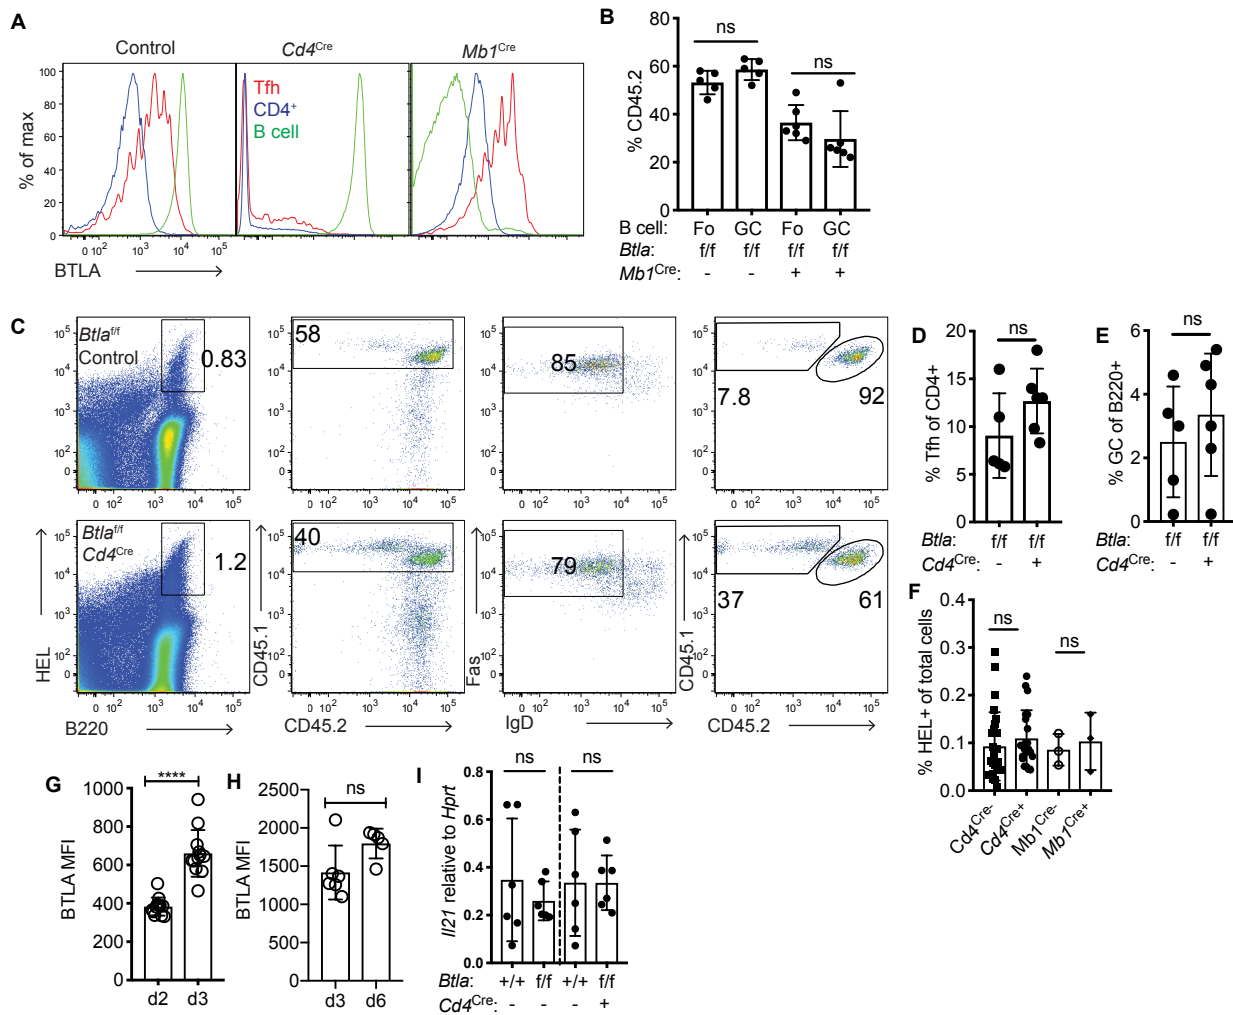

**Figure S3. Conditional deletion of BTLA in T cells abrogates HVEM-deficient GC advantage. Related to Figure 4.**

(A) BTLA MFI B220<sup>+</sup> B cells (green), CD4<sup>+</sup>TCRβ<sup>+</sup>CXCR5<sup>+</sup>PD1<sup>-</sup> Tfh cells (red), and CD4<sup>+</sup>TCRβ<sup>+</sup>CXCR5<sup>-</sup>PD1<sup>-</sup> non-Tfh CD4<sup>+</sup> T cells (blue) in *Btla<sup>f/f</sup>* animals. Cre<sup>-</sup> left, *Cd4<sup>Cre</sup>* middle, and *Mb1<sup>Cre</sup>* right. (B) Contribution of CD45.2 *Btla<sup>f/f</sup>* control or BTLA-B cell-deficient *Btla<sup>f/f</sup>* *Mb1<sup>Cre</sup>* CD45.2 cells to Fo and GC populations in spleen of mixed BM chimeras made with ~50% CD45.2 and ~50% WT CD45.1 BM at day 7 after SRBC immunization. Data are pooled from 2 experiments. (C) Representative flow cytometric analysis of the frequency of *Hvem<sup>-/-</sup>* CD45.1/2 HEL<sup>+</sup> GC B cells in *Btla<sup>f/f</sup>* control (top) and *Cd4<sup>Cre</sup>* (bottom) recipients at day 6 after 2x-HEL-SRBC. (D) Frequency of Tfh cells of CD4<sup>+</sup> T cells in *Btla<sup>f/f</sup>* *Cd4<sup>Cre</sup>* animals in the spleen after SRBC. Data are pooled from 2 experiments. (E) Frequency of GC B cells of B cells in *Btla<sup>f/f</sup>* *Cd4<sup>Cre</sup>* animals in the spleen after SRBC. Data are pooled from 2 experiments. (F) Frequency of HEL<sup>+</sup> B cells of total splenocytes after Hy10 transfer and 2x-HEL-SRBC immunization. Data are pooled from 4 experiments. (G) BTLA MFI on OT-II T cells at 48 hr and 72 hr after HEL-OVA or DEL-OVA immunization. Data are pooled from 2 experiments. (H) BTLA MFI on Tfh cells at 3 days and 6 days after 2x-HEL-SRBC immunization. (I) *I/21* mRNA transcript relative to *Hprt* from sorted splenic Tfh cells from *Btla<sup>f/f</sup>* control CD45.2 or *Cd4<sup>Cre</sup>* mixed CD45.1/2 WT BM chimeras at day 7 SRBC immunization. Data are pooled from 2 experiments. \*\*\*\*P<0.0001. Unpaired two-tailed Student's t test (B, D-I).

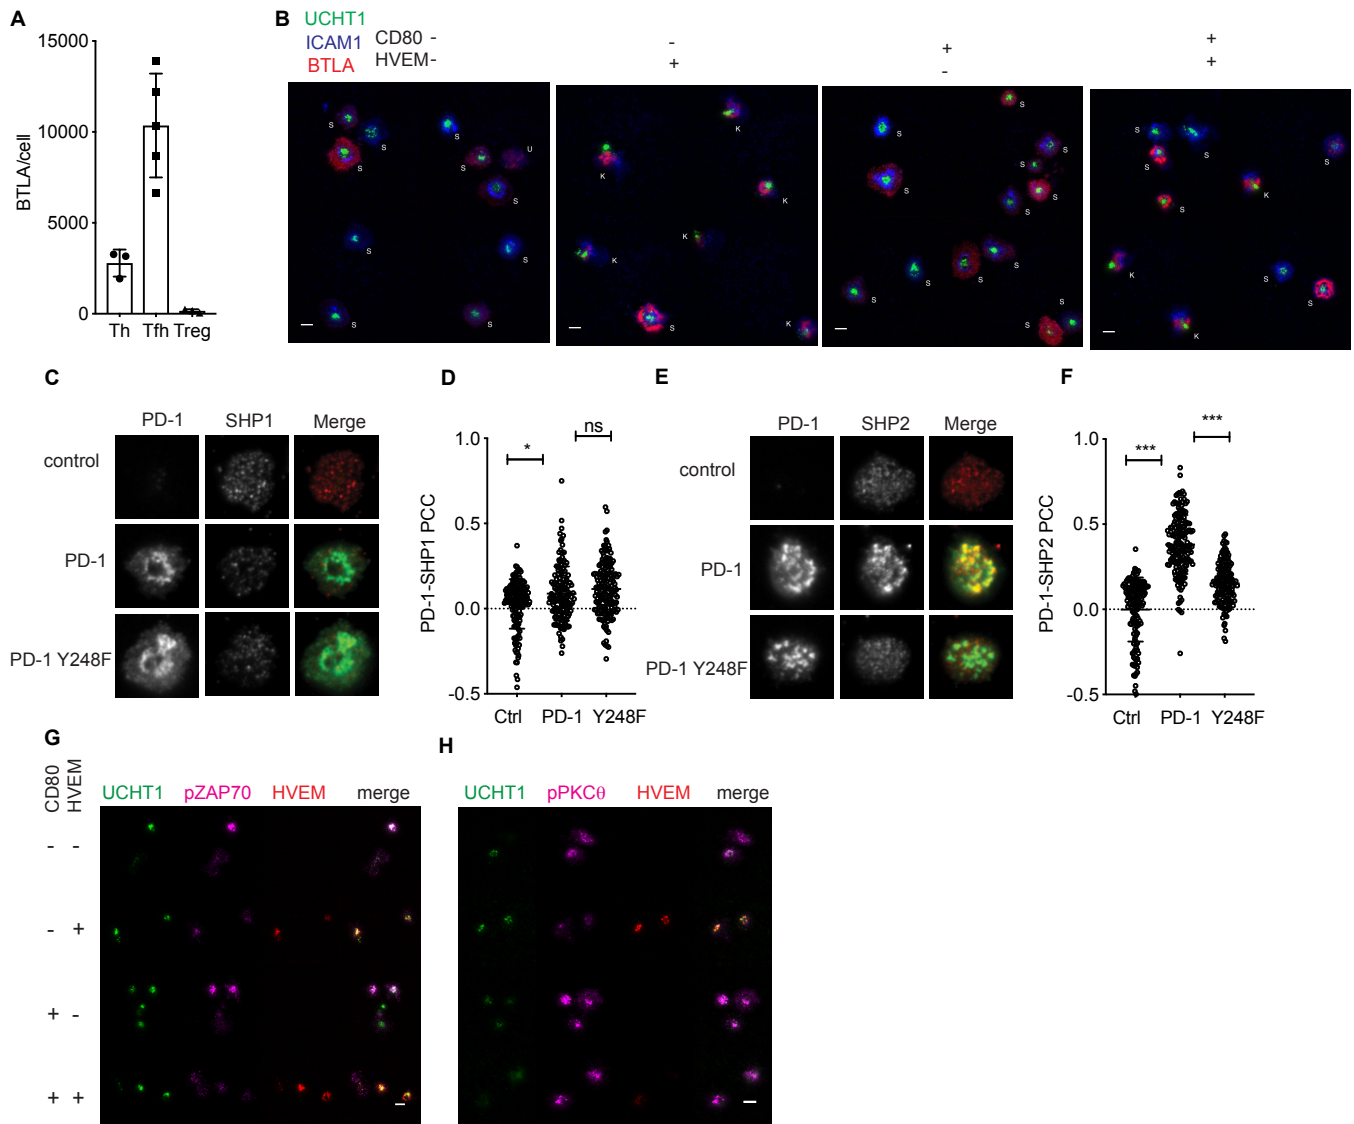

**Figure S4. BTLA-HVEM at the immunological synapse recruits SHP1 to inhibit signaling in Tfh cells. Related to Figure 5.**

(A) Expression of BTLA on human tonsil Tfh cells, Treg cells and untransfected CD4<sup>+</sup> blasts (Th). (B) Representative images of synapse (s) or kinapse (k) states in BTLA-transfected human CD4<sup>+</sup> T cell blasts on supported lipid bilayers containing anti-CD3 (UCHT1), ICAM1 and/or HVEM, CD80 as indicated. (C) Representative images of SHP1 recruitment to the synapse in relation to PD-1 or mutant PD-1 Y248F. (D) Quantification of SHP1 colocalization with WT PD-1 or mutant Y248F with or without (Ctrl) PDL-1 in the bilayer. (E) Representative images of SHP2 recruitment to the synapse in relation to PD-1 or mutant PD-1 Y248F. (F) Quantification of SHP2 colocalization with PD-1 or mutant Y248F with or without (Ctrl) PDL-1 in the bilayer. (G) Representative images of p-ZAP70 and (H) p-PKCθ in human CD4<sup>+</sup> T cell blasts transfected with BTLA shown at the same LUT. Scale bars are 5 μm. \*P<0.05, \*\*P<0.01, \*\*\*<P0.001, \*\*\*\*P<0.0001. Mann-Whitney test (D, F.)

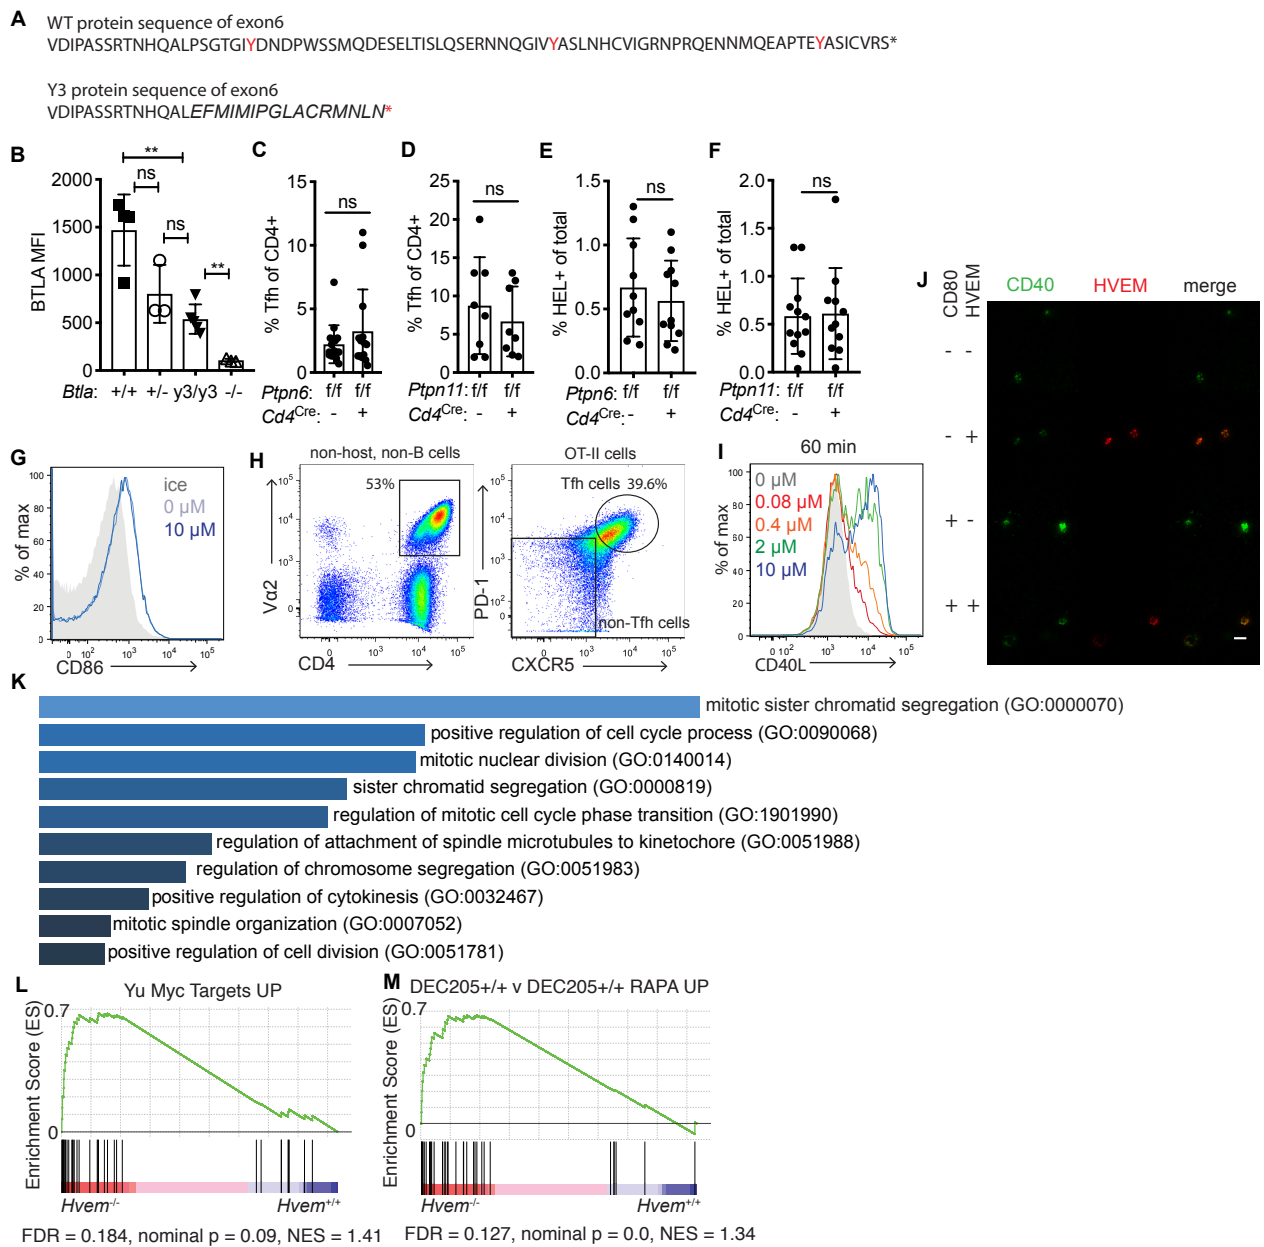

**Figure S5. BTLA signaling into the T cell through SHP1 is required for HVEM-deficient GC B cell competitiveness. Related to Figure 6.**

(A) Protein sequence of exon 6 of WT BTLA and mutant BTLA Y3. A short out-of-frame deletion was introduced at position 38 of exon 6 using CRISPR mutagenesis in the mouse embryo. Italics indicates nonsense sequence occurring after the deletion. \* denotes stop codon. (B) BTLA expression on *Btla*<sup>+/+</sup>, *Btla*<sup>-/-</sup>, *Btlay*<sup>3/y3</sup>, *Btla*<sup>-/-</sup> Tfh cells. Data pooled from 2 experiments. (C, D) Frequency of Tfh cells in *Ptpn6*<sup>f/f</sup> (SHP1) (C) and *Ptpn11*<sup>f/f</sup> (SHP2) (D) control and *Cd4*<sup>Cre</sup> animals. Data pooled from 2 experiments. (E, F) Frequency of HEL<sup>+</sup> cells in *Ptpn6*<sup>f/f</sup> (E) and *Ptpn11*<sup>f/f</sup> (F) control and *Cd4*<sup>Cre</sup> animals. Data pooled from 2 experiments. (G) Representative flow cytometric analysis of CD86 surface expression on B cells after a 2 hr pulse with or without OVA peptide (10 μM) and incubation with OT-II Tfh cells for 30 min compared to B cells kept on ice directly ex vivo. (H) Gating strategy for OT-II Tfh cells at d3 after HEL-OVA-SRBC + poly-I:C. (I) Representative flow cytometric analysis of CD40L surface mobilization on OT-II Tfh cells after a 60 min incubation with B cells pulsed with a titration of OVA peptide (0-10 μM). (J) Representative images of CD40 recruitment to the immunological synapse with or without HVEM and CD80 present in the lipid bilayer after 15 min incubation with blasting human CD4<sup>+</sup> T cells with standardized LUT across panels so fluorescence can be directly compared. Scale bars are 5 μm. (K) Gene ontology (GO) biological processes of genes significantly (padj < 0.01) upregulated in *Hvem*<sup>+/+</sup> v *Hvem*<sup>-/-</sup> GC B cells at d11 after NP-CGG from RNA-sequencing through Enrichr. Sorted by p-value. (L) GSEA of differentially expressed genes from RNA-sequencing of *Hvem*<sup>+/+</sup> v *Hvem*<sup>-/-</sup> mixed BM chimeras at d11 of the NP-CGG alum response compared to Yu Myc targets UP gene set. (M) GSEA of differentially expressed genes from RNA-sequencing of *Hvem*<sup>+/+</sup> v *Hvem*<sup>-/-</sup> mixed BM chimeras at d11 of the NP-CGG alum response compared to significant genes (< 0.01 padj) with > 2 fold increased gene expression in DEC205-WT GC B cells 24 hr after anti-DEC205-OVA compared to DEC205-WT Rapamycin treated. \*P < 0.05, \*\*P < 0.01, \*\*\*P < 0.001, \*\*\*\*P < 0.0001. Unpaired two-tailed Student's test (B-F).
